# Supplementary material
Source: PubMed Central journal article supplement (PMC4534351)
Supplement: NIHMS664446-supplement-3.pdf [file NIHMS664446-supplement-3.pdf]

## **INVENTORY OF SUPPLEMENTARY MATERIAL**

### Supplementary Figures and Legends

Figure S1: Related to Fig. 2

Figure S2: Related to Fig. 4

Figure S3: Related to Fig. 5

Figure S4: Related to Fig. 7

### Supplementary Tables

Table S1: Related to Fig. 7

### Supplementary Experimental Procedures

### Supplementary References
